# Supplementary material for: Coaggregation of polyglutamine (polyQ) proteins is mediated by polyQ-tract interactions and impairs cellular proteostasis: Coaggregation of polyQ proteins
Source: PubMed Central journal article supplement — Acta Biochim Biophys Sin (Shanghai). 2023 May 11;55(5):736–48. doi: 10.3724/abbs.2023081 (PMC10281877; doi:10.3724/abbs.2023081), 2023-05-11
Supplement: 22562Supplementary_Tables.pdf [file 22562Supplementary_Tables.pdf]

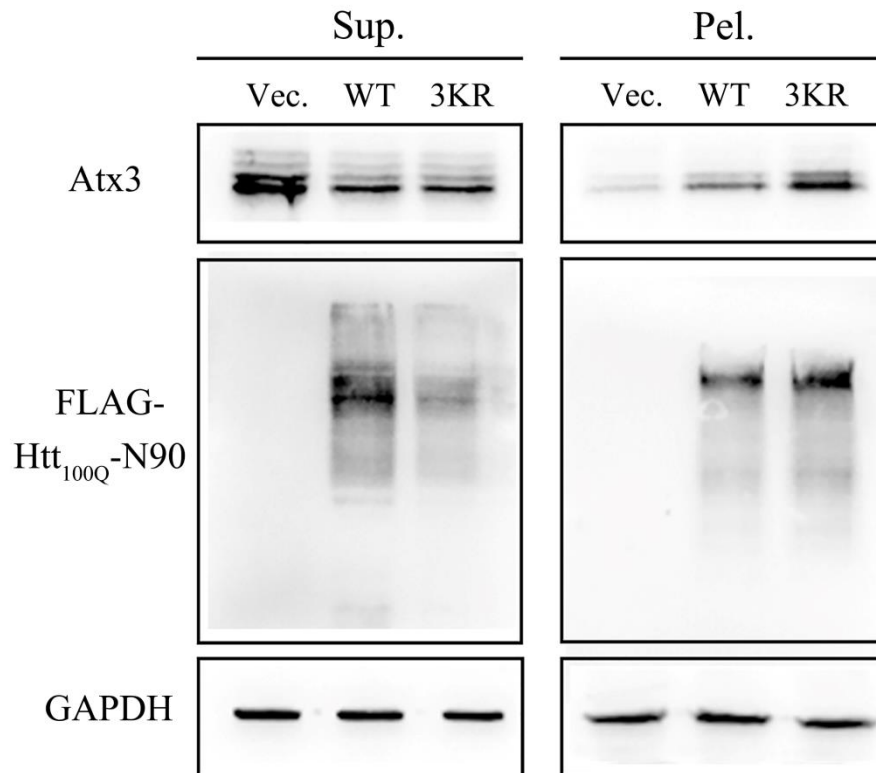

**Supplementary Figure S1. The PQE Htt fragment sequesters endogenous Atx3 into insoluble aggregates**

Supernatant/pellet fractionation combined with western blot analysis was carried out to detect the sequestration of endogenous Atx3 by WT Htt<sub>100Q</sub>-N90 and its 3KR mutant. HEK 293T cells were transfected with empty vector, Htt<sub>100Q</sub>-N90 or its 3KR mutant. About 48 h after transfection, the cell lysates were subject to supernatant/pellet fractionation and then western blot analysis with an anti-FLAG or anti-Atx3 antibody. WT, Htt<sub>100Q</sub>-N90; 3KR, the 3KR mutant of Htt<sub>100Q</sub>-N90; Vec., vector; Sup., supernatant; Pel., pellet.

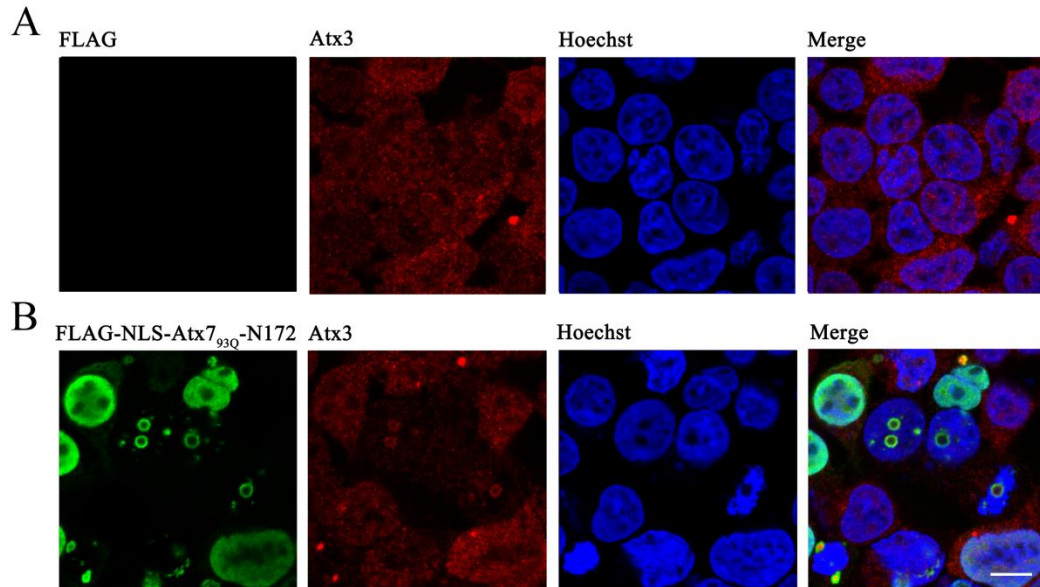

**Supplementary Figure S2. Immunofluorescence images showing sequestration of endogenous Atx3 into inclusions by a nuclear form of the PQE Atx7 fragment in cells**

(A) Vector control. (B) NLS-Atx7<sub>93Q</sub>-N172. HEK 293T cells were transfected with the FLAG-NLS-Atx7<sub>93Q</sub>-N172 plasmid or control vector and then subjected to confocal microscopic imaging. Atx7<sub>93Q</sub>-N172 and endogenous Atx3 were stained with an anti-FLAG (green) or anti-Atx3 antibody (red), and nuclei were stained with Hoechst (blue). Scale bar: 10  $\mu$ m. NLS, nuclear localization signal.

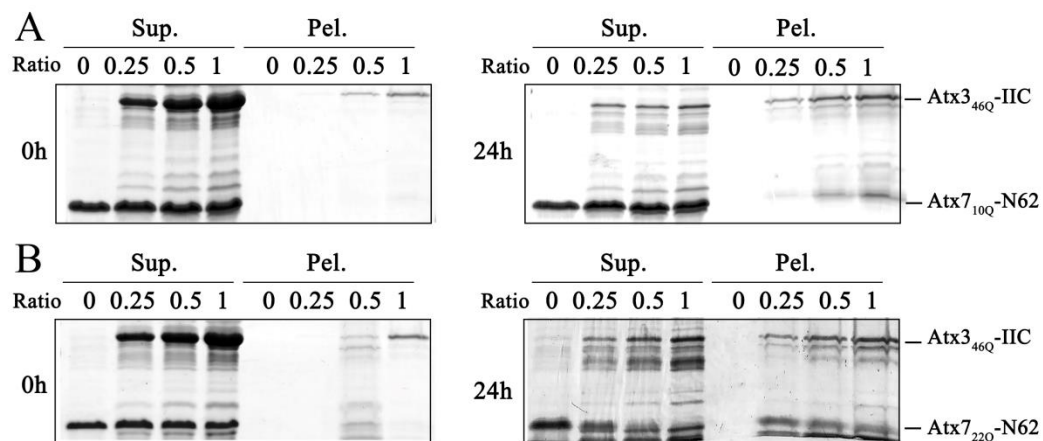

**Supplementary Figure S3. Co-precipitation of Atx3<sub>46Q</sub>-IIC with Atx7-N62 *in vitro***

(A) Atx<sub>346Q</sub>-IIC with Atx<sub>710Q</sub>-N62. (B) Atx<sub>346Q</sub>-IIC with Atx<sub>722Q</sub>-N62. The protein mixtures were incubated for 24 h and then subject to supernatant/pellet fractionation and SDS-PAGE (15% gel). Atx<sub>346Q</sub>-IIC was mixed with Atx<sub>710Q</sub>-N62 or Atx<sub>722Q</sub>-N62 (50 μM) at an increasing molar ratio of Atx<sub>346Q</sub>-IIC/Atx7-N62 (0:1, 0.25:1, 0.5:1 and 1:1). Atx3-IIC, C-terminal fragment (residues 221–373) of isoform-II Atx3; Atx7-N62, N-terminal fragment (residues 1–62) of Atx7. Sup., supernatant; Pel., pellet.

**Supplementary Table S1. List of the constructs applied in this study**

| Constructs                         | Vectors    | Restriction enzyme sites    | Additional                            |
|------------------------------------|------------|-----------------------------|---------------------------------------|
| Trx-Atx <sub>710Q</sub> -N62       | pET-32M    | <i>Bam</i> HI/ <i>Xho</i> I | Residues 1-62, N-Trx tag              |
| Trx-Atx <sub>722Q</sub> -N62       | pET-32M    | <i>Bam</i> HI/ <i>Xho</i> I | Residues 1-62, N-Trx tag              |
| Trx-Atx <sub>733Q</sub> -N62       | pET-32M    | <i>Bam</i> HI/ <i>Xho</i> I | Residues 1-62, N-Trx tag              |
| Trx-Atx <sub>722Q</sub> -N62(T3N9) | pET-32M    | <i>Bam</i> HI/ <i>Xho</i> I | Residues 1-62, Q32T/Q38N              |
| Atx <sub>322Q</sub> -IIC           | pET-22b(+) | <i>Bam</i> HI/ <i>Xho</i> I | Residues 221-373, isoform II          |
| Atx <sub>36Q</sub> -IIC            | pET-22b(+) | <i>Bam</i> HI/ <i>Xho</i> I | Residues 221-373, isoform II          |
| GB1-Atx <sub>346Q</sub> -IIC       | pGBTNH     | <i>Nde</i> I/ <i>Xho</i> I  | Residues 221-373, isoform II, GB1 tag |
| HA-Atx <sub>322Q</sub>             | pcDNA3.0   | <i>Bam</i> HI/ <i>Xho</i> I | Full length, isoform I, WT            |
| HA-Atx <sub>310Q</sub>             | pcDNA3.0   | <i>Bam</i> HI/ <i>Xho</i> I | Full length, isoform I                |
| HA-Atx <sub>33Q</sub>              | pcDNA3.0   | <i>Bam</i> HI/ <i>Xho</i> I | Full length, isoform I                |
| HA-Atx <sub>223Q</sub> -N317       | pcDNA3.0   | <i>Bam</i> HI/ <i>Not</i> I | Residues 1-317                        |
| HA-Atx <sub>29Q</sub> -N317        | pcDNA3.0   | <i>Bam</i> HI/ <i>Not</i> I | Residues 1-317                        |
| HA-Atx <sub>23Q</sub> -N317        | pcDNA3.0   | <i>Bam</i> HI/ <i>Not</i> I | Residues 1-317                        |
| HA-AR <sub>23Q</sub>               | pcDNA3.0   | <i>Bam</i> HI/ <i>Xho</i> I | Full length, WT                       |
| HA-AR <sub>10Q</sub>               | pcDNA3.0   | <i>Bam</i> HI/ <i>Xho</i> I | Full length                           |
| HA-AR <sub>3Q</sub>                | pcDNA3.0   | <i>Bam</i> HI/ <i>Xho</i> I | Full length                           |
| FLAG-AR                            | pcDNA3.0   | Seamless cloning kit        | 3x FLAG, Full length                  |
| pGL3-ARE                           | pGL3       | <i>Sac</i> I/ <i>Xho</i> I  | 3x ARE                                |
| FLAG-Htt <sub>18Q</sub> -N552      | pcDNA3.0   | <i>Bam</i> HI/ <i>Xho</i> I | Residues 1-552                        |
| FLAG-Htt <sub>100Q</sub> -N552     | pcDNA3.0   | <i>Bam</i> HI/ <i>Xho</i> I | Residues 1-552                        |

|                                   |          |                             |                                |
|-----------------------------------|----------|-----------------------------|--------------------------------|
| FLAG-Htt <sub>100Q</sub> -N90     | pcDNA3.0 | <i>Bam</i> HI/ <i>Xho</i> I | Residues 1-90                  |
| FLAG-Htt <sub>100Q</sub> -N90-3KR | pcDNA3.0 | <i>Bam</i> HI/ <i>Xho</i> I | Residues 1-90,<br>K6R/K9R/K15R |
| FLAG-Atx <sub>710Q</sub> -N172    | pcDNA3.0 | <i>Bam</i> HI/ <i>Xho</i> I | Residues 1-172                 |
| FLAG-Atx <sub>793Q</sub> -N172    | pcDNA3.0 | <i>Bam</i> HI/ <i>Xho</i> I | Residues 1-172                 |

**Supplementary Table S2. List of the antibodies used in this study**

| Antibody           | Source        | Catalog number |
|--------------------|---------------|----------------|
| Anti-FLAG (mouse)  | Sigma-Aldrich | F1804          |
| Anti-FLAG (rabbit) | Proteintech   | 20543-1-AP     |
| Anti-HA (mouse)    | Sigma-Aldrich | H9658          |
| Anti-AR (mouse)    | Santa Cruz    | sc-7305        |
| Anti-Atx3 (rabbit) | Abclonal      | A1243          |
| GAPDH (mouse)      | Proteintech   | 60004-1-Ig     |
